# Supplementary material for: Genome-Wide Identification and Characterization of the PPO Gene Family in Cotton (Gossypium) and Their Expression Variations Responding to Verticillium Wilt Infection
Source: MDPI journal article supplement (doi:10.3390/genes14020477), 2023-02-13
Supplement: s1 [file s1]

Table S1 Numbers of introns and conserved motifs of cotton PPO genes

| Gene Name        | Gene ID          | Intron number | Conserved motif number |
|------------------|------------------|---------------|------------------------|
| <i>Ga_PPO_1</i>  | Ga03G2532        | 1             | 10                     |
| <i>Ga_PPO_2</i>  | Ga06G1498        | 0             | 11                     |
| <i>Ga_PPO_3</i>  | Ga06G1499        | 1             | 7                      |
| <i>Ga_PPO_4</i>  | Ga06G2142        | 0             | 10                     |
| <i>Ga_PPO_5</i>  | Ga06G2393        | 0             | 10                     |
| <i>Ga_PPO_6</i>  | Ga09G0868        | 0             | 10                     |
| <i>Ga_PPO_7</i>  | Ga14G1905        | 2             | 9                      |
| <i>Gr_PPO_1</i>  | Gorai.005G244400 | 1             | 10                     |
| <i>Gr_PPO_2</i>  | Gorai.006G086400 | 0             | 10                     |
| <i>Gr_PPO_3</i>  | Gorai.008G029600 | 2             | 10                     |
| <i>Gr_PPO_4</i>  | Gorai.010G151800 | 0             | 11                     |
| <i>Gr_PPO_5</i>  | Gorai.010G152000 | 0             | 10                     |
| <i>Gr_PPO_6</i>  | Gorai.010G213100 | 0             | 10                     |
| <i>Gr_PPO_7</i>  | Gorai.010G213300 | 2             | 9                      |
| <i>Gr_PPO_8</i>  | Gorai.010G254900 | 0             | 10                     |
| <i>GH_PPO_1</i>  | GH_A03G2196      | 1             | 10                     |
| <i>GH_PPO_2</i>  | GH_A06G1441      | 0             | 11                     |
| <i>GH_PPO_3</i>  | GH_A06G1442      | 0             | 10                     |
| <i>GH_PPO_4</i>  | GH_A06G2011      | 0             | 10                     |
| <i>GH_PPO_5</i>  | GH_A06G2315      | 0             | 10                     |
| <i>GH_PPO_6</i>  | GH_A09G0900      | 0             | 10                     |
| <i>GH_PPO_7</i>  | GH_A12G0274      | 1             | 10                     |
| <i>GH_PPO_8</i>  | GH_D02G2367      | 1             | 10                     |
| <i>GH_PPO_9</i>  | GH_D06G1461      | 0             | 11                     |
| <i>GH_PPO_10</i> | GH_D06G1462      | 0             | 10                     |
| <i>GH_PPO_11</i> | GH_D06G2044      | 0             | 10                     |
| <i>GH_PPO_12</i> | GH_D06G2047      | 1             | 9                      |
| <i>GH_PPO_13</i> | GH_D06G2351      | 0             | 10                     |
| <i>GH_PPO_14</i> | GH_D09G0860      | 0             | 10                     |
| <i>GB_PPO_1</i>  | GB_A03G2281      | 1             | 10                     |
| <i>GB_PPO_2</i>  | GB_A06G1484      | 0             | 8                      |
| <i>GB_PPO_3</i>  | GB_A06G1485      | 0             | 10                     |
| <i>GB_PPO_4</i>  | GB_A06G2053      | 0             | 10                     |
| <i>GB_PPO_5</i>  | GB_A06G2345      | 0             | 10                     |
| <i>GB_PPO_6</i>  | GB_A09G1011      | 0             | 10                     |
| <i>GB_PPO_7</i>  | GB_A12G0273      | 1             | 10                     |
| <i>GB_PPO_8</i>  | GB_D02G2425      | 1             | 10                     |

|                  |             |   |    |
|------------------|-------------|---|----|
| <i>GB_PPO_9</i>  | GB_D06G1511 | 0 | 8  |
| <i>GB_PPO_10</i> | GB_D06G1512 | 1 | 8  |
| <i>GB_PPO_11</i> | GB_D06G2136 | 0 | 10 |
| <i>GB_PPO_12</i> | GB_D06G2138 | 0 | 5  |
| <i>GB_PPO_13</i> | GB_D06G2142 | 1 | 10 |
| <i>GB_PPO_14</i> | GB_D06G2444 | 7 | 9  |
| <i>GB_PPO_15</i> | GB_D09G0864 | 0 | 10 |
| <i>GB_PPO_16</i> | GB_D12G0284 | 1 | 10 |

---
